# Supplementary material
Source: HighWire-hosted journal article supplement (https://bmjopen.bmj.com/content/14/11/e087602)
Supplement: inline-supplementary-material-1 [file inline-supplementary-material-1.pdf]

## Appendix 1

### Standards for Reporting Qualitative Research (SRQR)

| No.        | Topic                                        | Item                                                                                                                                                                                                                                                                                                                                             | Description of the location |
|------------|----------------------------------------------|--------------------------------------------------------------------------------------------------------------------------------------------------------------------------------------------------------------------------------------------------------------------------------------------------------------------------------------------------|-----------------------------|
|            | <b>Title and abstract</b>                    |                                                                                                                                                                                                                                                                                                                                                  |                             |
| <b>S1</b>  | Title                                        | Concise description of the nature and topic of the study<br>Identifying the study as qualitative or indicating the approach (e.g., ethnography, grounded theory) or data collection methods (e.g., interview, focus group) is recommended                                                                                                        | Page 1                      |
| <b>S2</b>  | Abstract                                     | Summary of key elements of the study using the abstract format of the intended publication; typically includes background, purpose, methods, results, and conclusions                                                                                                                                                                            | Page 2                      |
|            | <b>Introduction</b>                          |                                                                                                                                                                                                                                                                                                                                                  |                             |
| <b>S3</b>  | Problem formulation                          | Description and significance of the problem/phenomenon studied; review of relevant theory and empirical work; problem statement                                                                                                                                                                                                                  | Page 4-5                    |
| <b>S4</b>  | Purpose or research question                 | Purpose of the study and specific objectives or questions                                                                                                                                                                                                                                                                                        | Page 6                      |
|            | <b>Methods</b>                               |                                                                                                                                                                                                                                                                                                                                                  |                             |
| <b>S5</b>  | Qualitative approach and research paradigm   | Qualitative approach (e.g., ethnography, grounded theory, case study, phenomenology, narrative research) and guiding theory if appropriate; identifying the research paradigm (e.g., postpositivist, constructivist/ interpretivist) is also recommended; rationale                                                                              | Page 7                      |
| <b>S6</b>  | Researcher characteristics and reflexivity   | Researchers' characteristics that may influence the research, including personal attributes, qualifications/experience, relationship with participants, assumptions, and/or presuppositions; potential or actual interaction between researchers' characteristics and the research questions, approach, methods, results, and/or transferability | Page 9-10                   |
| <b>S7</b>  | Context                                      | Setting/site and salient contextual factors; rationale                                                                                                                                                                                                                                                                                           | Page 7                      |
| <b>S8</b>  | Sampling strategy                            | How and why research participants, documents, or events were selected; criteria for deciding when no further sampling was necessary (e.g., sampling saturation); rationale                                                                                                                                                                       | Page 7                      |
| <b>S9</b>  | Ethical issues pertaining to human subjects  | Documentation of approval by an appropriate ethics review board and participant consent, or explanation for lack thereof; other confidentiality and data security issues                                                                                                                                                                         | Page 10                     |
| <b>S10</b> | Data collection methods                      | Types of data collected; details of data collection procedures including (as appropriate) start and stop dates of data collection and analysis, iterative process, triangulation of sources/methods, and modification of procedures in response to evolving study findings; rationale                                                            | Page 8                      |
| <b>S11</b> | Data collection instruments and technologies | Description of instruments (e.g., interview guides, questionnaires) and devices (e.g., audio recorders) used for data collection; if/how the instrument(s) changed over the course of the study                                                                                                                                                  | Page 9                      |
| <b>S12</b> | Units of study                               | Number and relevant characteristics of participants, documents, or events included in the study; level of participation (could be reported in results)                                                                                                                                                                                           | Page 10-11                  |
| <b>S13</b> | Data processing                              | Methods for processing data prior to and during analysis, including transcription, data entry, data management and security, verification of data integrity, data coding, and anonymization/deidentification of excerpts                                                                                                                         | Page 9                      |

|            |                                                                                              |                                                                                                                                                                                                                                                                                                        |            |
|------------|----------------------------------------------------------------------------------------------|--------------------------------------------------------------------------------------------------------------------------------------------------------------------------------------------------------------------------------------------------------------------------------------------------------|------------|
| <b>S14</b> | Data analysis                                                                                | Process by which inferences, themes, etc., were identified and developed, including the researchers involved in data analysis; usually references a specific paradigm or approach; rationale                                                                                                           | Page 8-9   |
| <b>S15</b> | Techniques to enhance trustworthiness                                                        | Techniques to enhance trustworthiness and credibility of data analysis (e.g., member checking, audit trail, triangulation); rationale                                                                                                                                                                  | Page 9     |
|            | <b>Results/findings</b>                                                                      |                                                                                                                                                                                                                                                                                                        |            |
| <b>S16</b> | Synthesis and interpretation                                                                 | Main findings (e.g., interpretations, inferences, and themes); might include development of a theory or model, or integration with prior research or theory                                                                                                                                            | Page 11    |
| <b>S17</b> | Links to empirical data                                                                      | Evidence (e.g., quotes, field notes, text excerpts, photographs) to substantiate analytic findings                                                                                                                                                                                                     | Page 12-17 |
|            | <b>Discussion</b>                                                                            |                                                                                                                                                                                                                                                                                                        |            |
| <b>S18</b> | Integration with prior work, implications, transferability, and contribution(s) to the field | Short summary of main findings; explanation of how findings and conclusions connect to, support, elaborate on, or challenge conclusions of earlier scholarship; discussion of scope of application/ generalizability; identification of unique contribution(s) to scholarship in a discipline or field | Page 18-24 |
| <b>S19</b> | Limitations                                                                                  | Trustworthiness and limitations of findings                                                                                                                                                                                                                                                            | Page 25    |
|            | <b>Other</b>                                                                                 |                                                                                                                                                                                                                                                                                                        |            |
| <b>S20</b> | Conflicts of interest                                                                        | Potential sources of influence or perceived influence on study conduct and conclusions; how these were managed                                                                                                                                                                                         | Page 27    |
| <b>S21</b> | Funding                                                                                      | Sources of funding and other support; role of funders in data collection, interpretation, and reporting                                                                                                                                                                                                | Page 27    |
